# Supplementary material for: Recyclable nano copper oxide catalyzed synthesis of quinoline-2,3-dicarboxylates under ligand free conditions
Source: Royal Society of Chemistry journal article supplement (doi:10.1039/c3ra47212d), 2014-01-01

# **Recyclable Nano Copper Oxide Catalyzed Synthesis of Quinoline-2,3-dicarboxylates Under Ligand Free Conditions**

Avudoddi Venkanna,<sup>a</sup> Kokkerala Swapna, and Pallapothula Venkateswar Rao<sup>\*a</sup>

<sup>a</sup> *Department of Chemistry, Nizam College, Osmania University, Basheerbagh, Nampally,  
500029, India. Tel: +91-40-27037934, Fax: +91-40-23240806*

*E-mail: pallapothulavrao@gmail.com*

# Contents

|                                                                                                   |          |
|---------------------------------------------------------------------------------------------------|----------|
| <b>Copies of <math>^1\text{H}</math> NMR and <math>^{13}\text{C}</math> NMR of Compounds.....</b> | <b>3</b> |
|---------------------------------------------------------------------------------------------------|----------|

# Copies of $^1\text{H}$ NMR and $^{13}\text{C}$ NMR of Compounds

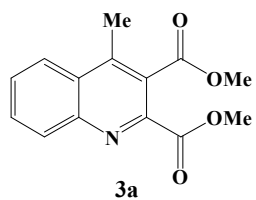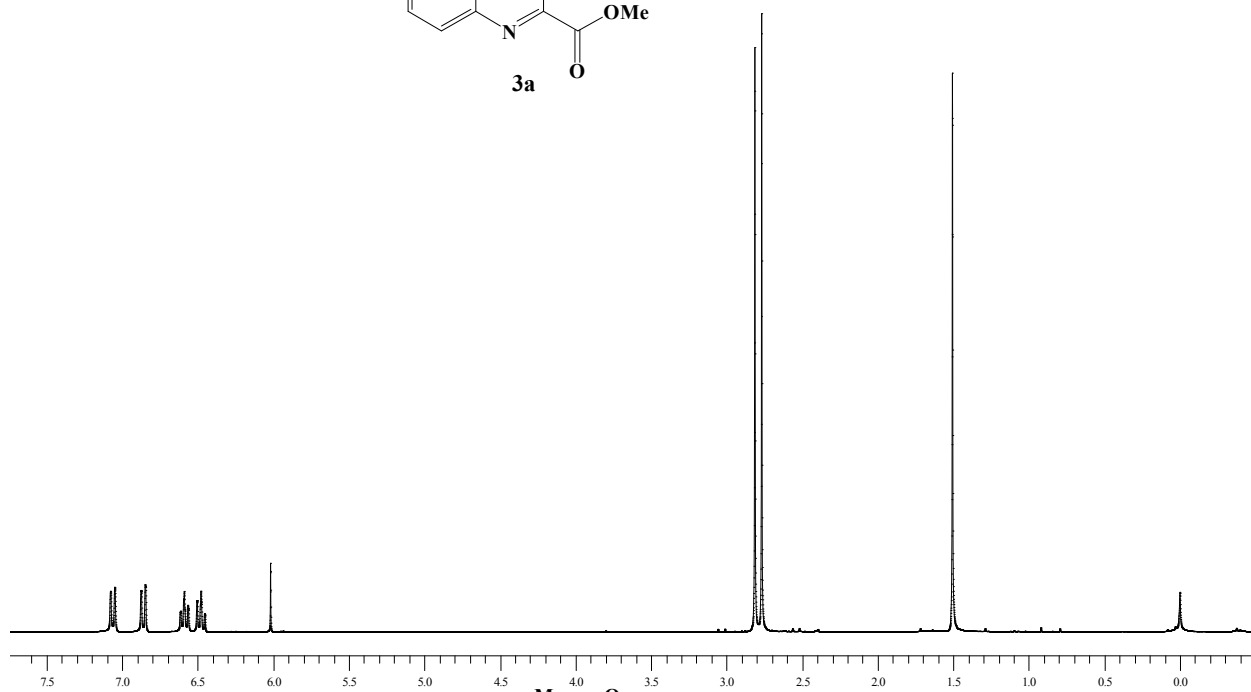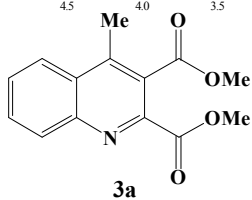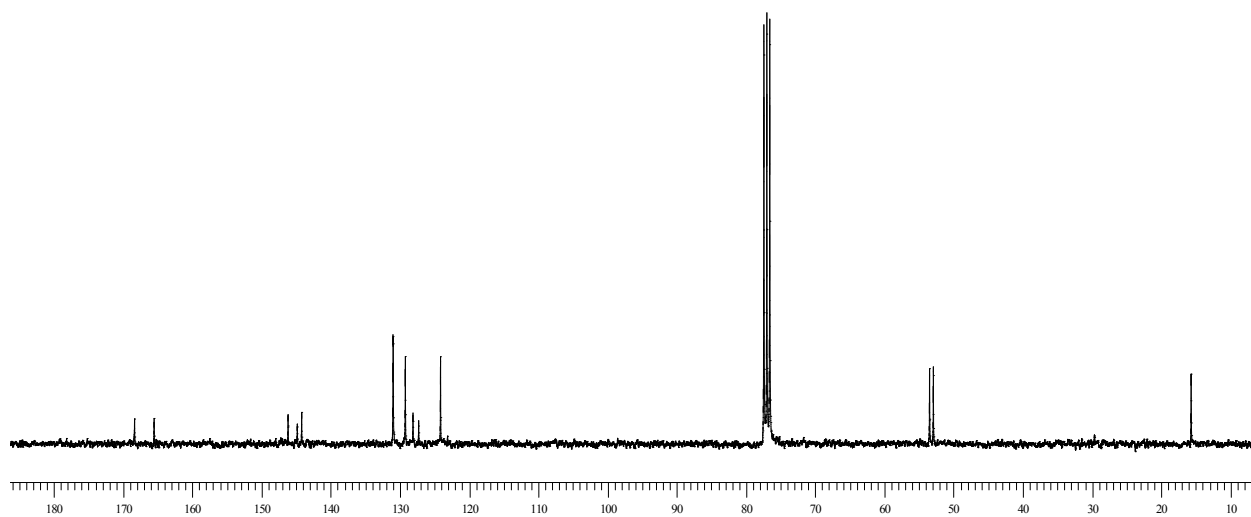

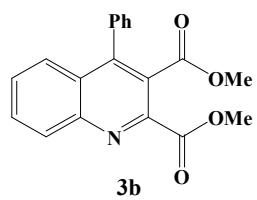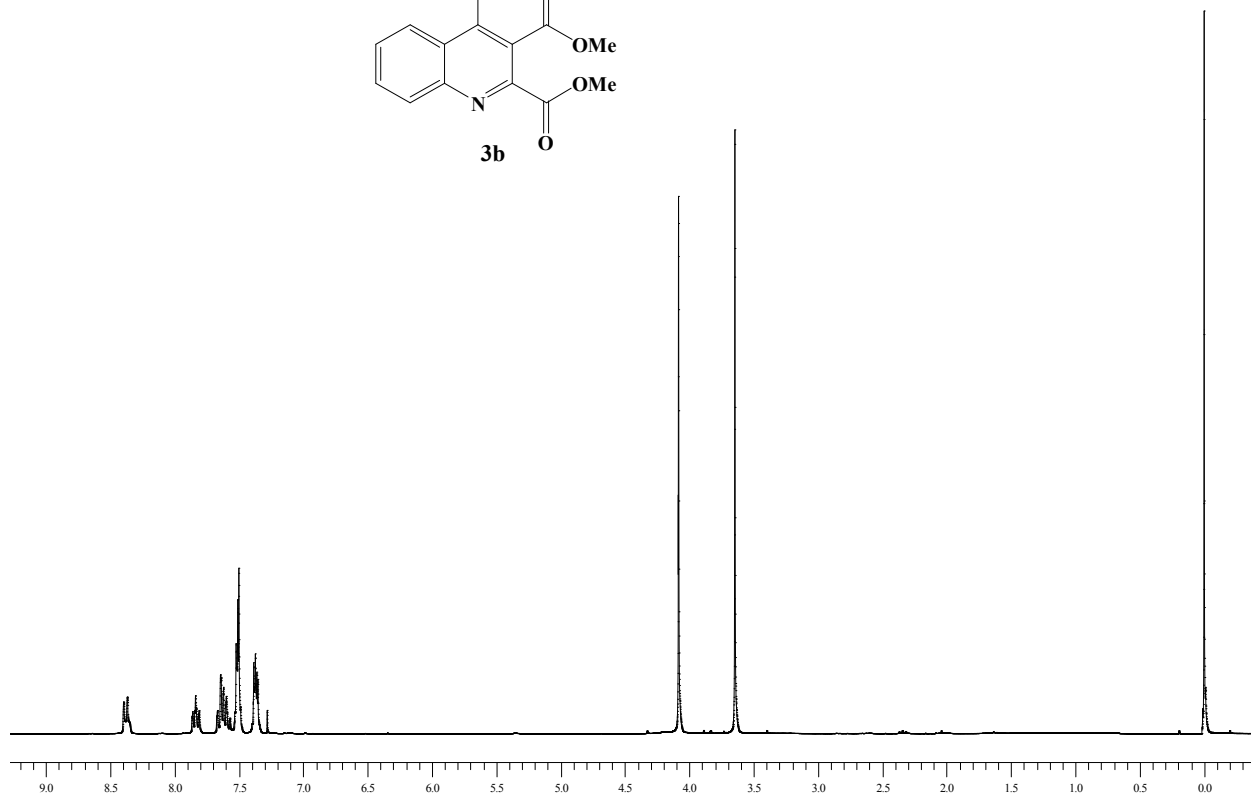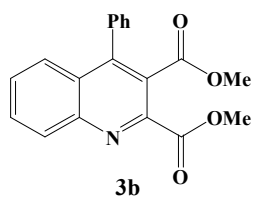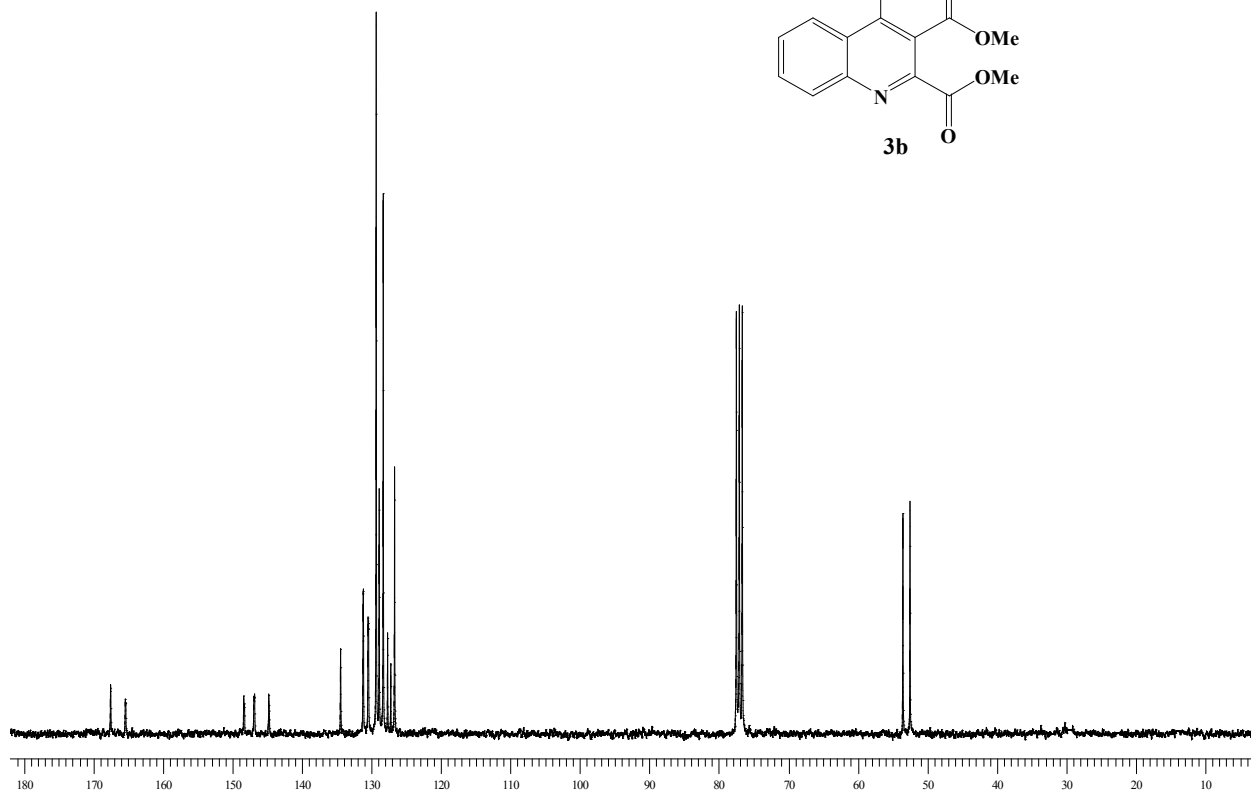



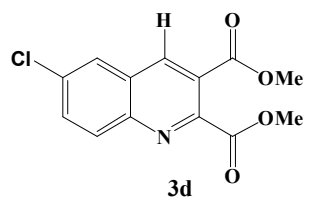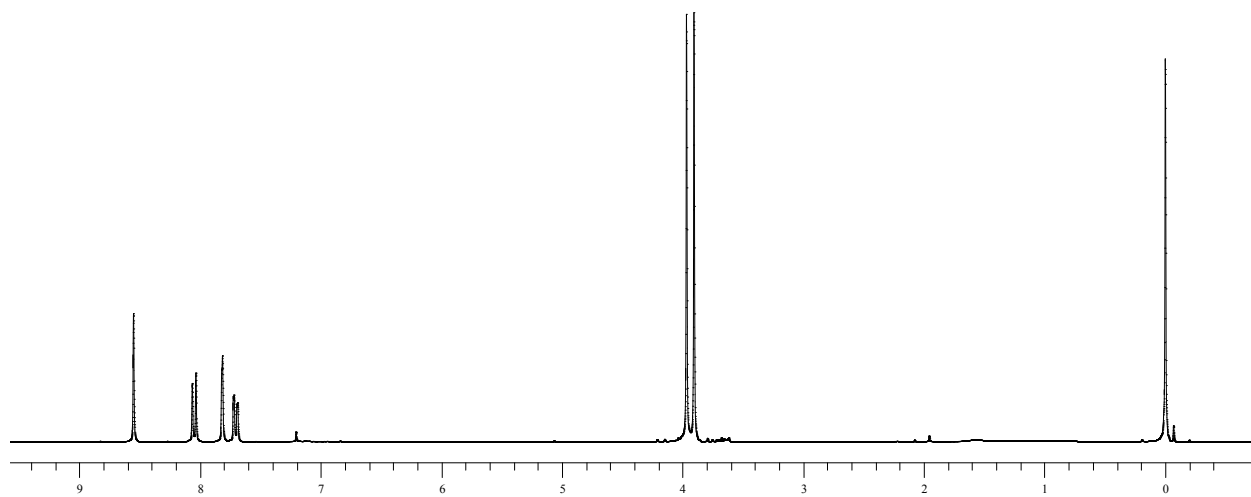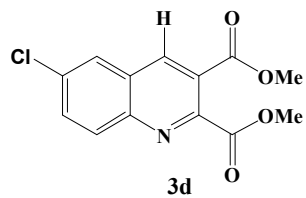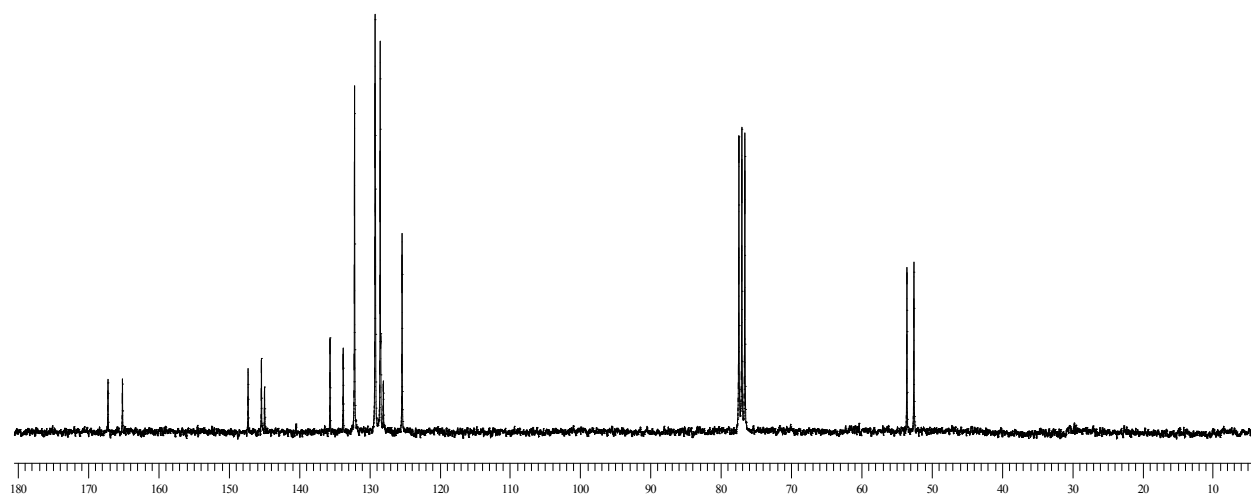

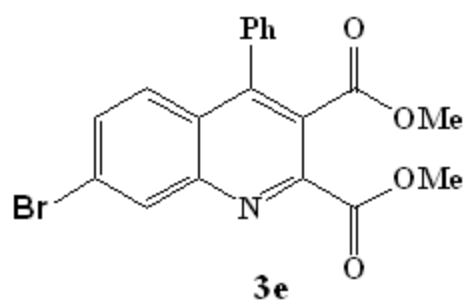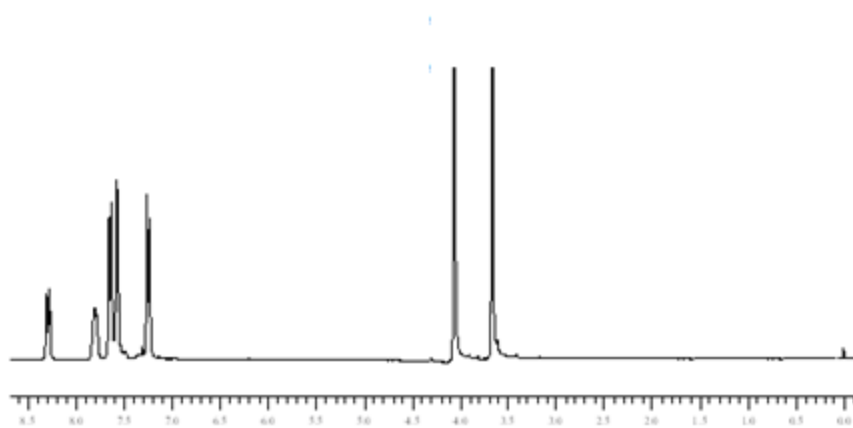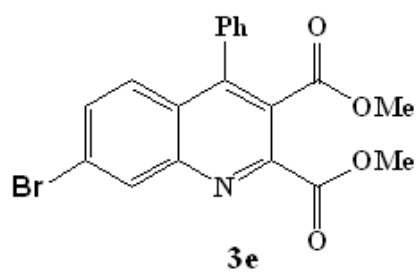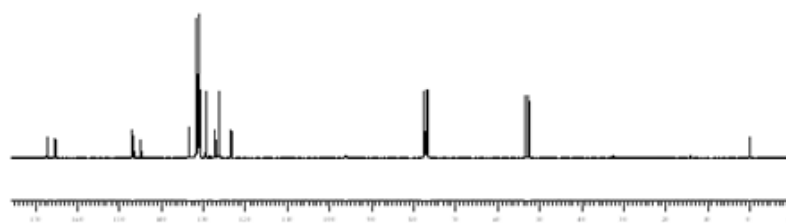

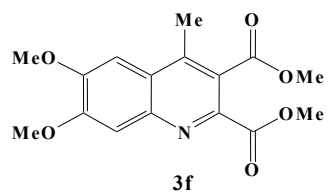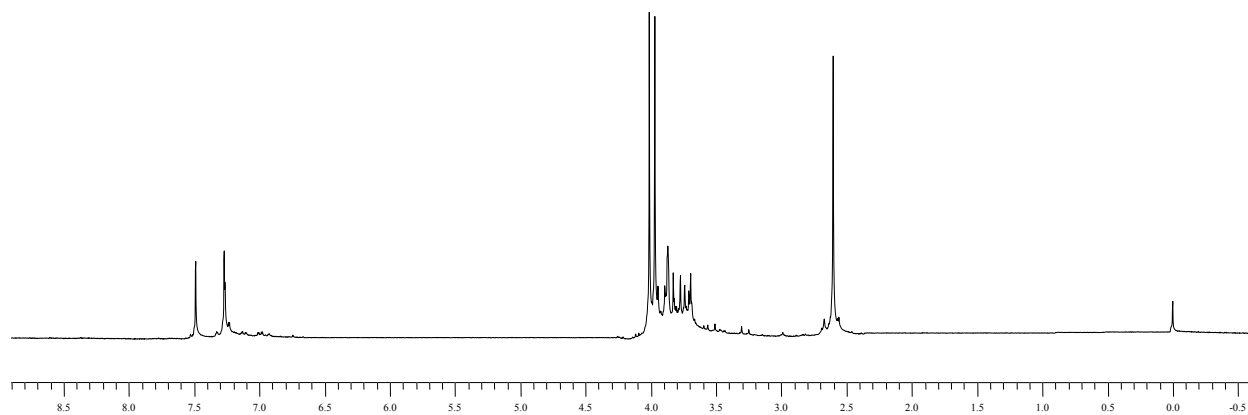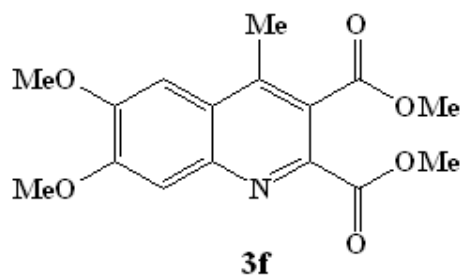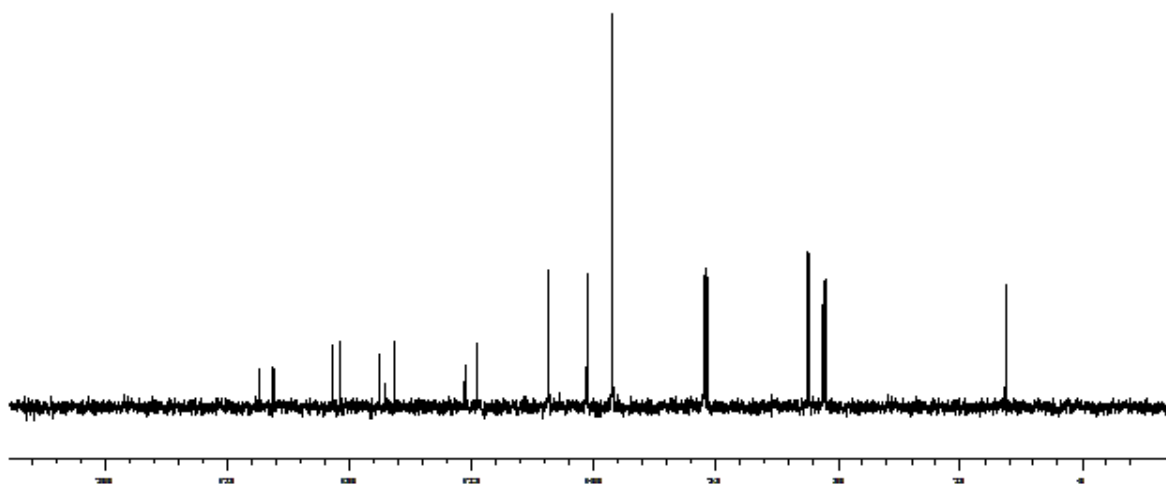



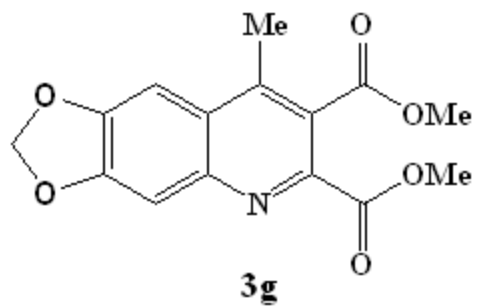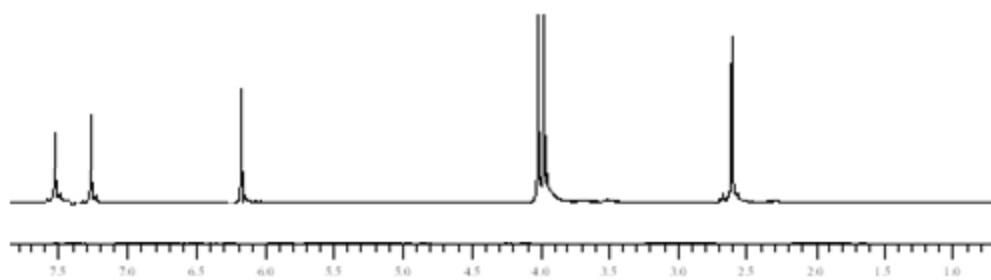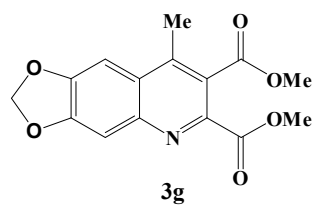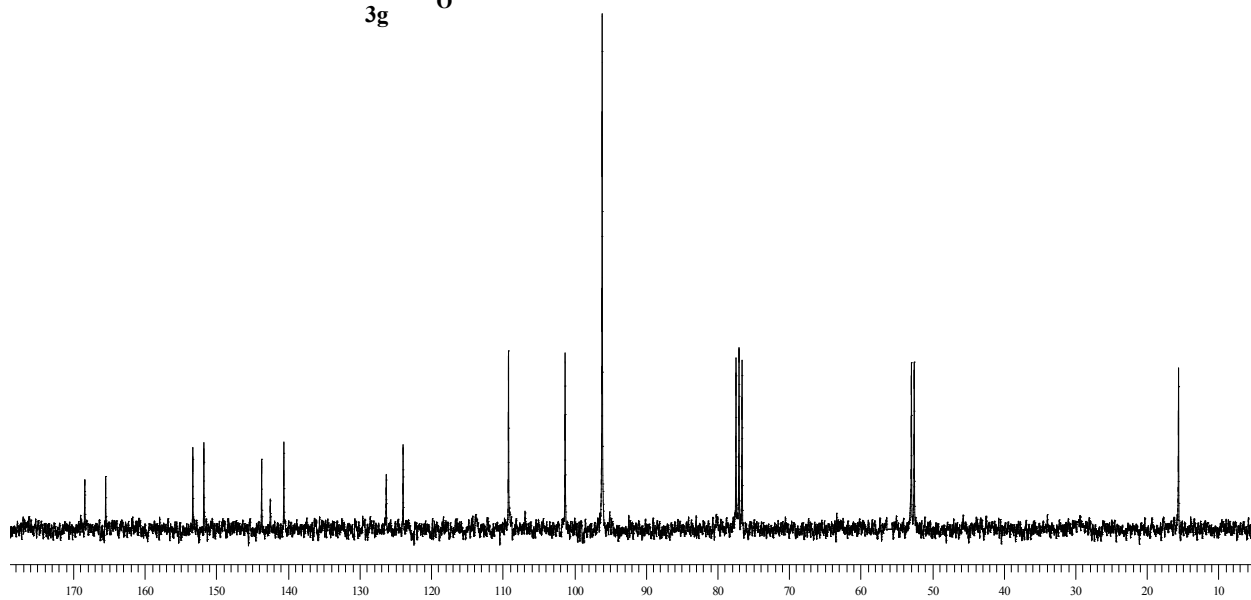

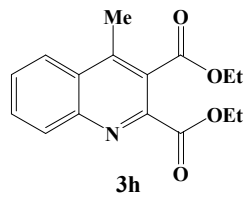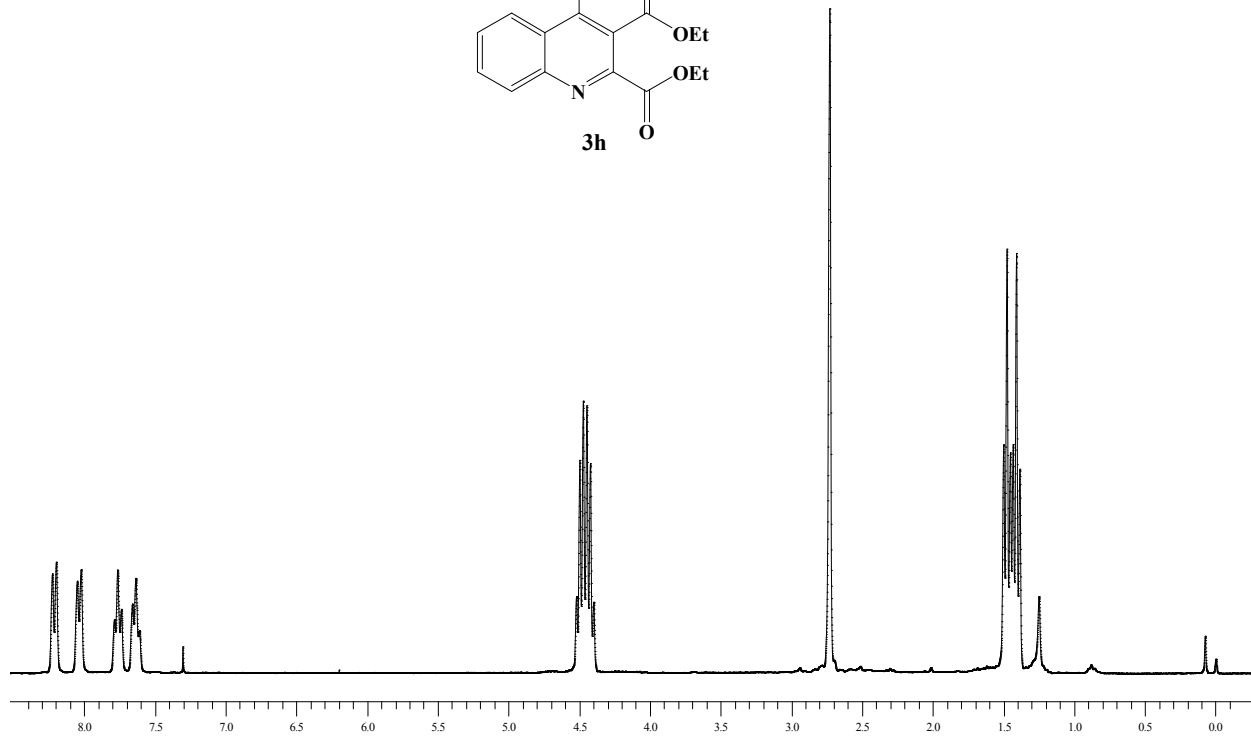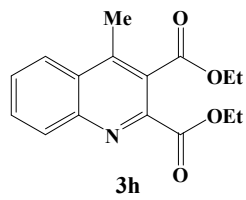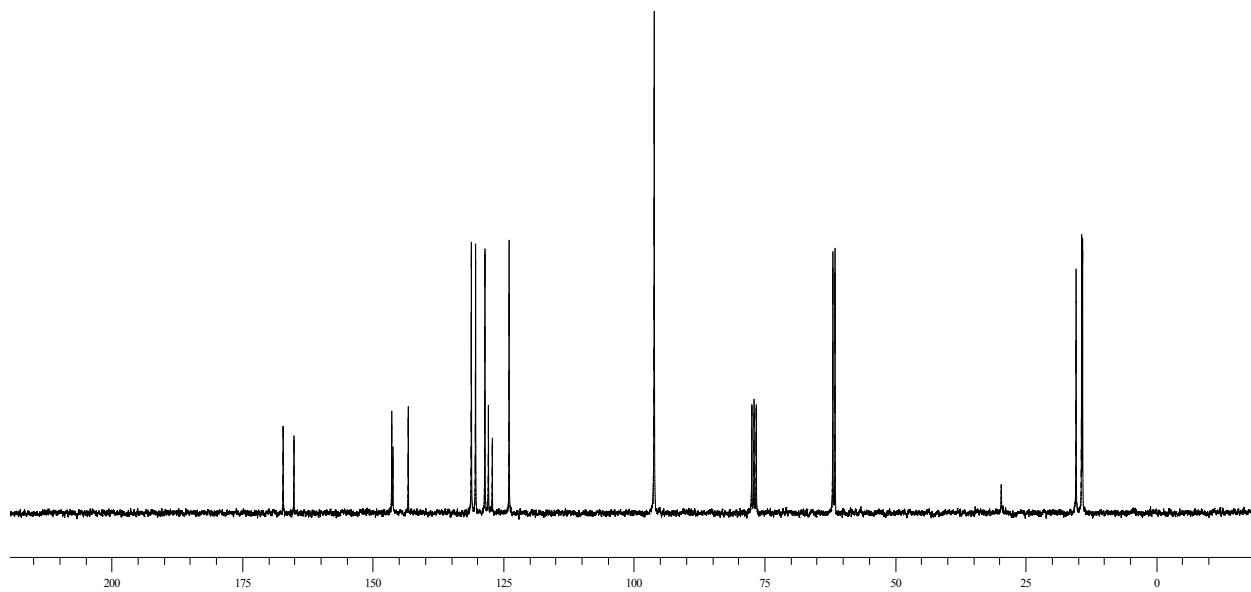

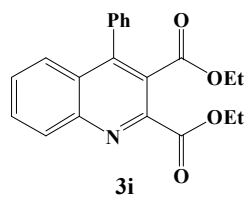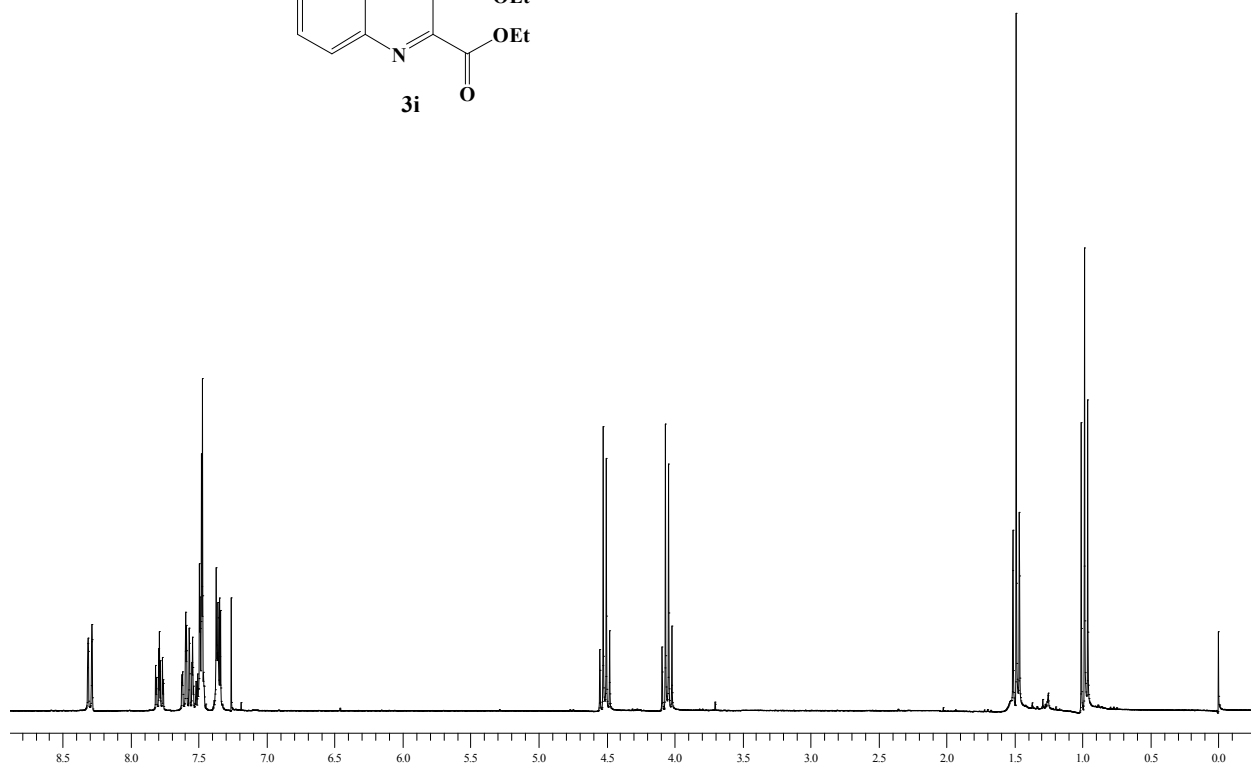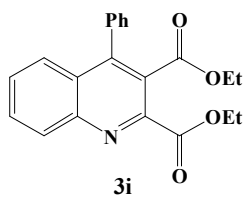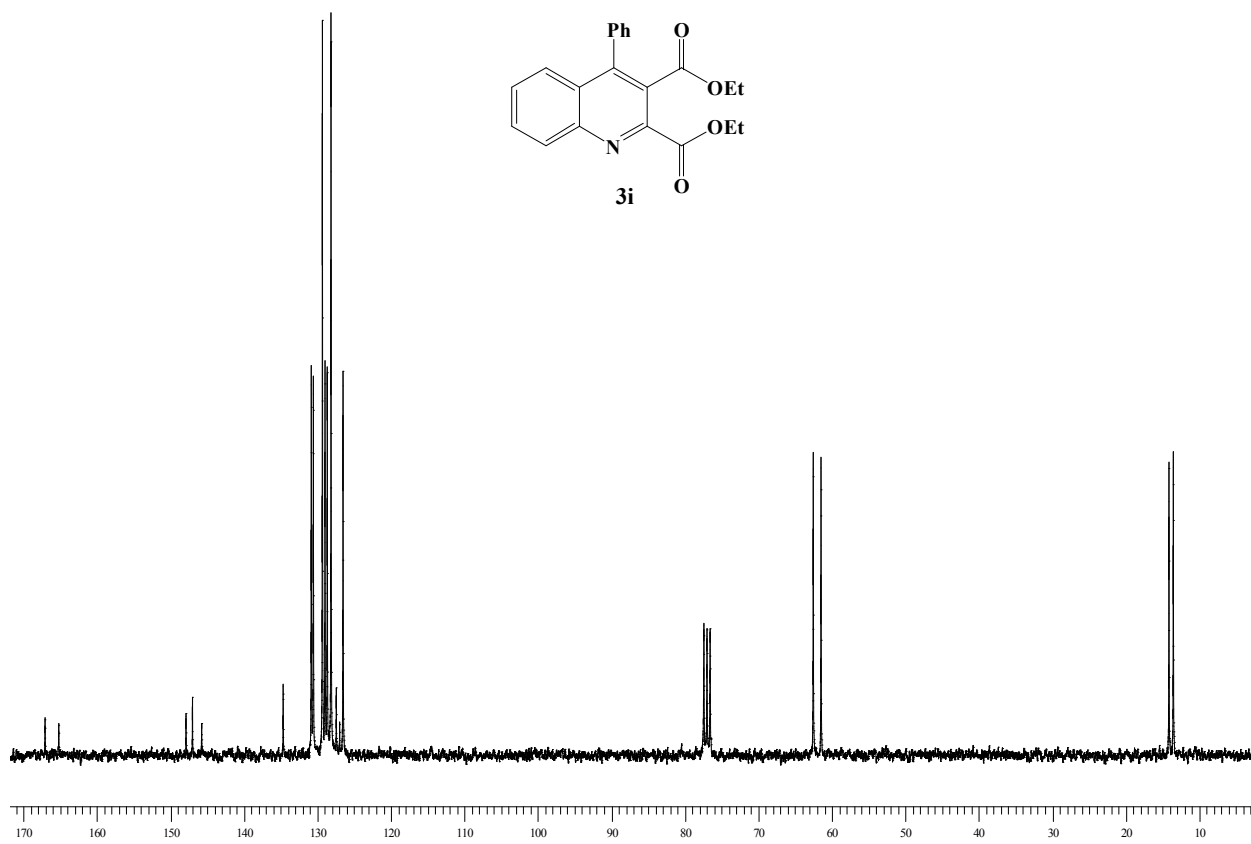

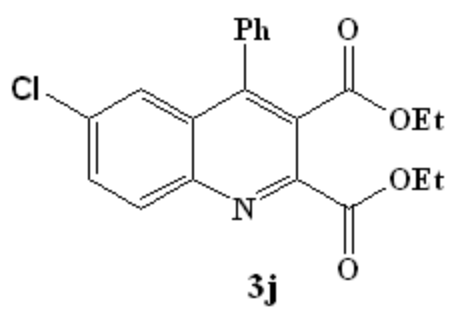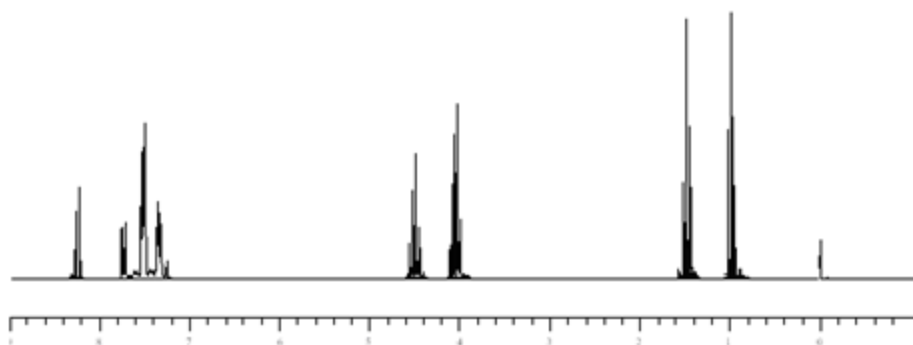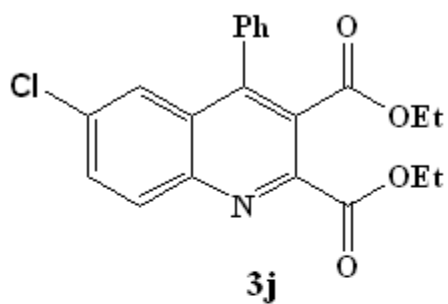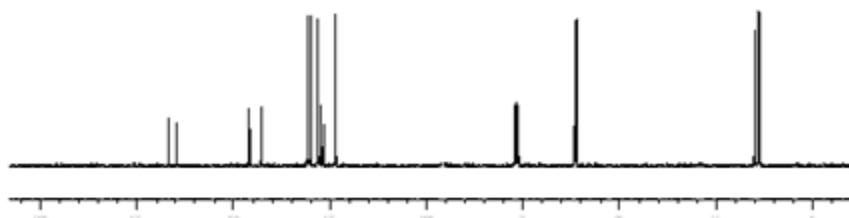

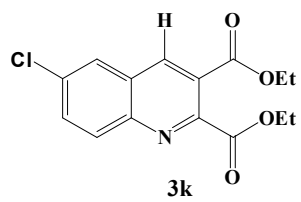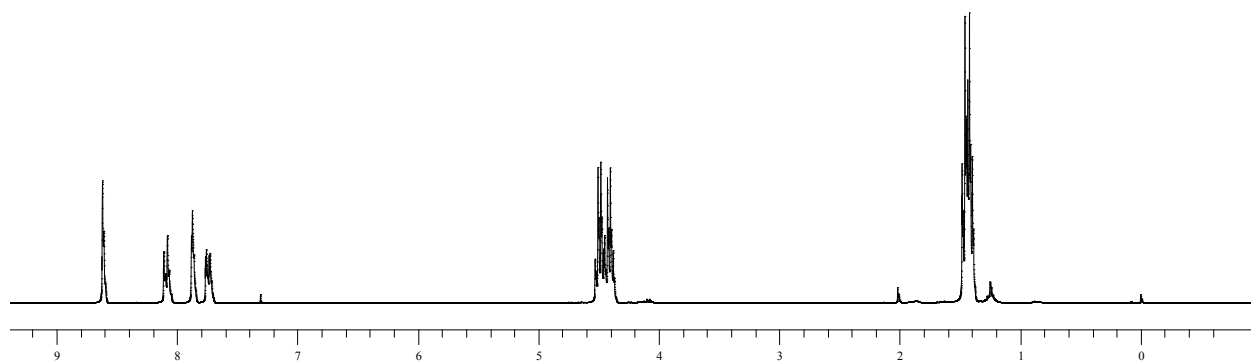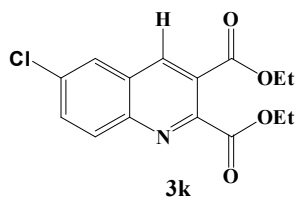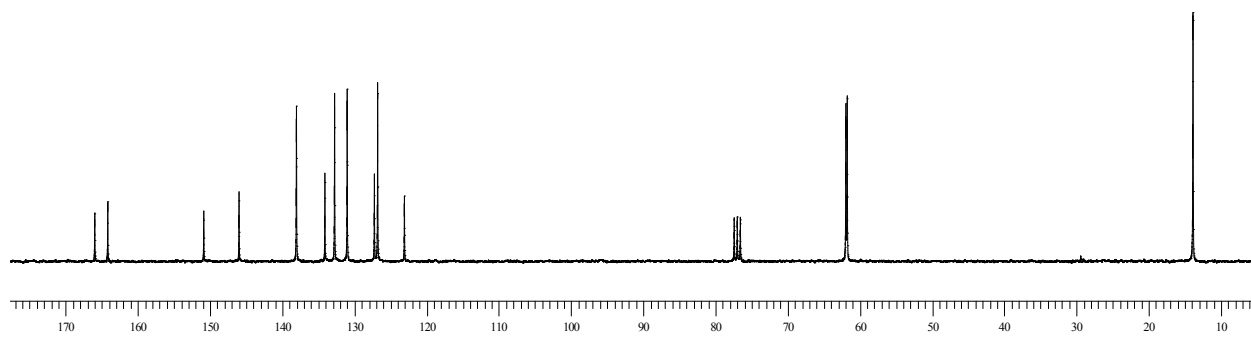

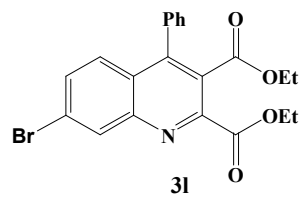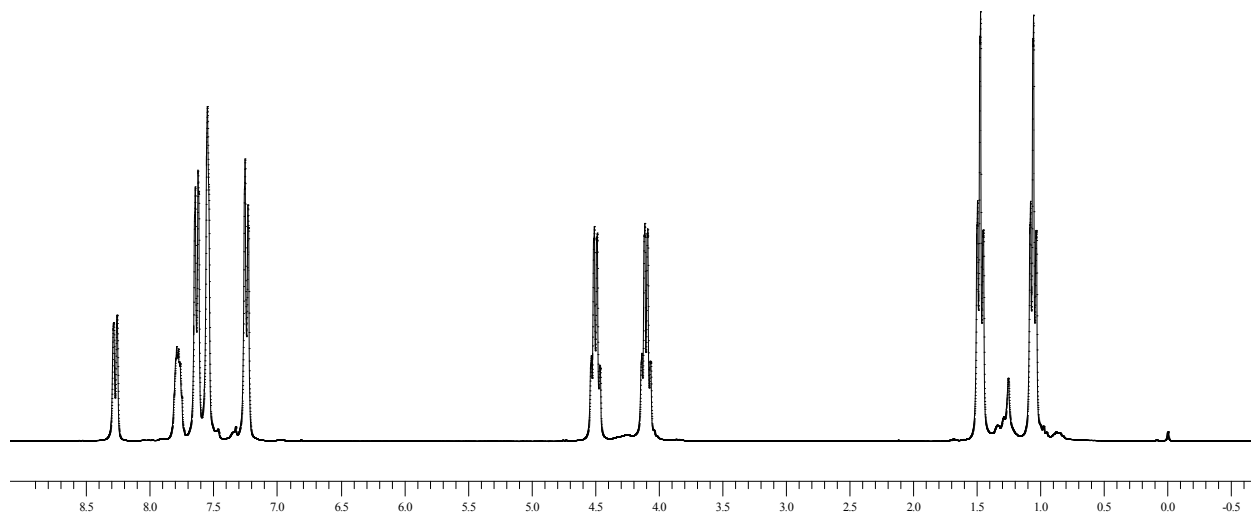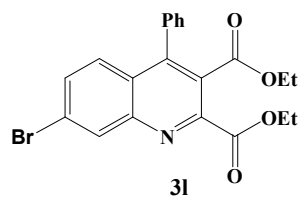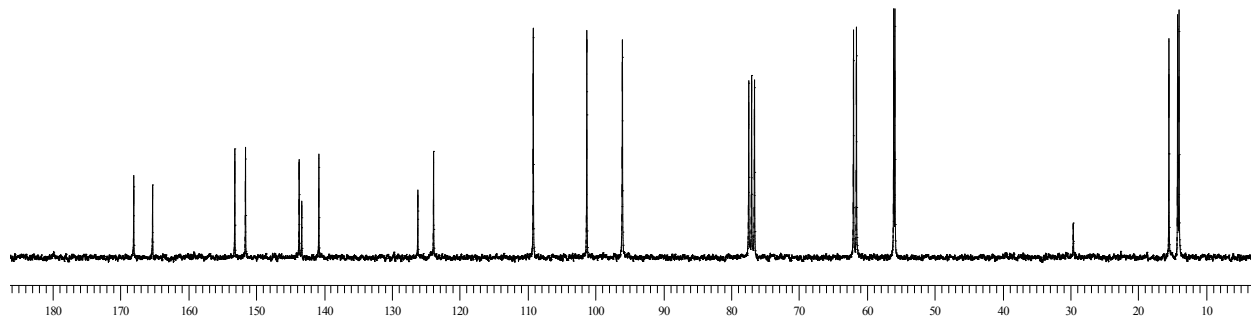

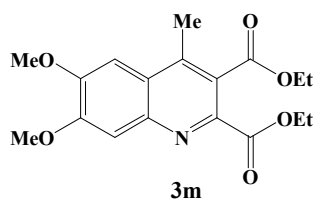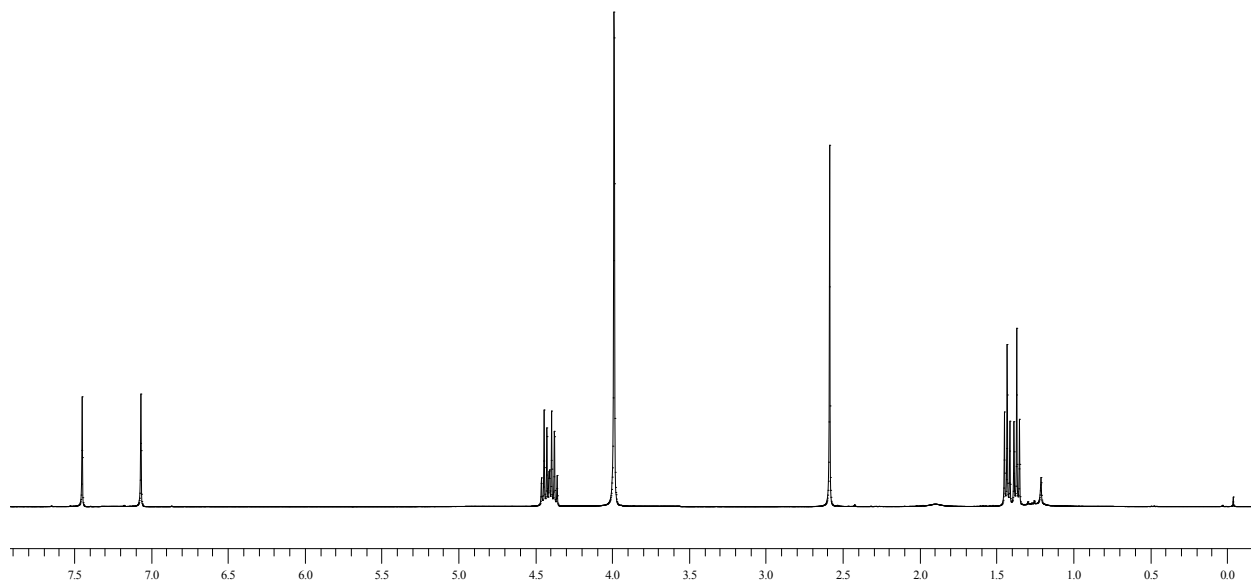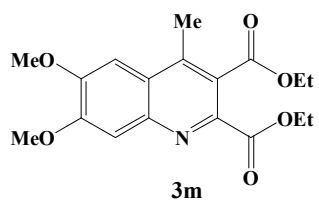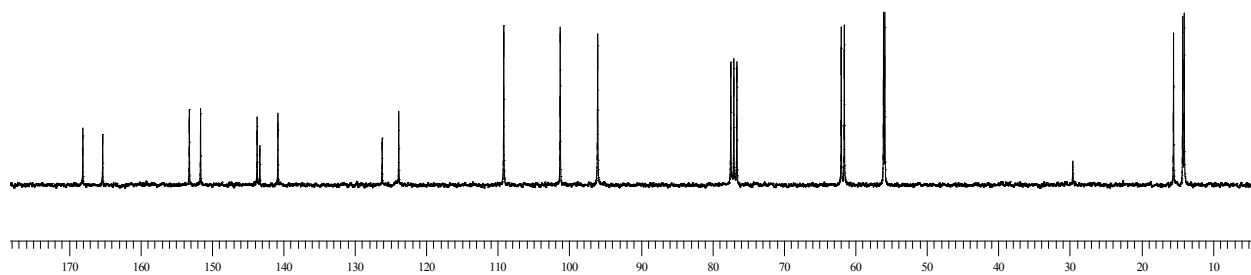

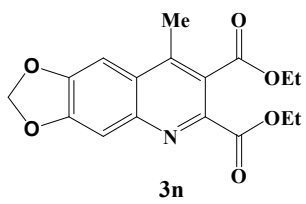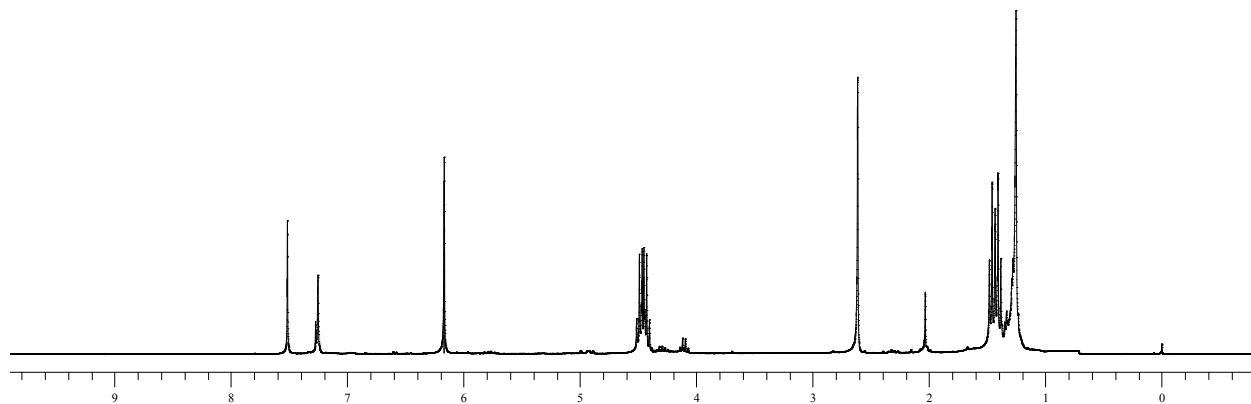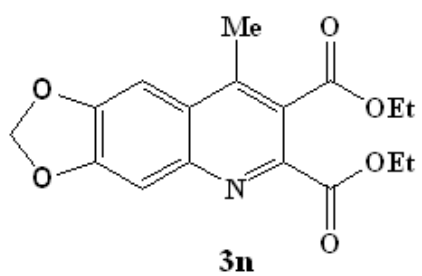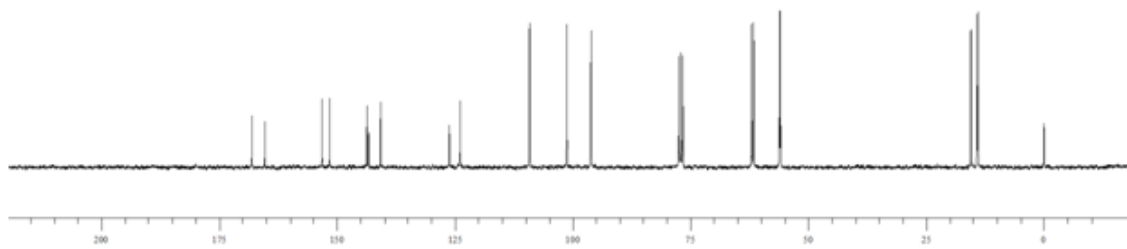

Supplement: c3ra47212d1.pdf [file c3ra47212d1.pdf]
